# Supplementary material
Source: publisher figshare collection journal article supplement (https://frontiersin.figshare.com/ndownloader/files/22552994)
Supplement: Supplementary file [file 22552994]

## *Supplementary Material*

### **1 Supplementary Data**

#### **1.1 Supplementary Data 1. Literature search**

##### **MEDLINE:**

("Hemophilia A"[Mesh] OR "Hemophilia A"[tw] OR "Haemophilia A"[tw] OR "Factor VIII"[tw] OR "Factor 8"[tw] OR "FVIII"[tw] OR "Factor VIII"[Mesh:NoExp] OR "H?emophilia B"[Mesh] OR "H?emophilia B"[tw] OR "Factor 9"[tw] OR "Factor IX"[tw] OR "Factor IX"[Mesh:NOExp] OR "H?emophilia"[tw]) AND ("nonneutralizing"[tw] OR "non-neutralizing"[tw] OR "nonneutralising"[tw] OR "non-neutralising"[tw] OR "Antibodies, Neutralizing"[Mesh] OR ("neutralising"[tw] OR "neutralizing"[tw] OR "inhibitory"[tw]) AND ("Antibodies"[Mesh:NoExp] OR "antibodies"[tw] OR "abs"[ti] OR "antibody"[tw]))

Number of articles: 992 on 12-07-2018; 64 extra publications on 11-07-2019.

The other databases (Embase, WOS and Cochrane) were searched using the same search terms.

**1.2 Supplementary Data 2. Adapted JBI checklist****JBI Critical Appraisal Checklist for Studies Reporting Prevalence Data**

Reviewer\_\_\_\_\_Date\_\_\_\_\_

Author\_\_\_\_\_Year\_\_\_\_\_Record Number\_\_\_\_\_

|                                                                                                                                                                                                                                                                                                                                              | Yes                      | No                       | Unclear                  | Not applicable           |
|----------------------------------------------------------------------------------------------------------------------------------------------------------------------------------------------------------------------------------------------------------------------------------------------------------------------------------------------|--------------------------|--------------------------|--------------------------|--------------------------|
| <b>1. Was the sample frame appropriate to address the target population?</b>                                                                                                                                                                                                                                                                 |                          |                          |                          |                          |
| <ul style="list-style-type: none"> <li>• Yes: if the target population were INH-haemophilia patients</li> <li>• No: if acquired haemophilia, INH+ haemophilia or other population (healthy donors) were studied</li> </ul>                                                                                                                   | <input type="checkbox"/> | <input type="checkbox"/> | <input type="checkbox"/> | <input type="checkbox"/> |
| <b>2. Were study participants sampled in an appropriate way?</b>                                                                                                                                                                                                                                                                             |                          |                          |                          |                          |
| <ul style="list-style-type: none"> <li>• Yes: if random sample or consecutive</li> </ul>                                                                                                                                                                                                                                                     | <input type="checkbox"/> | <input type="checkbox"/> | <input type="checkbox"/> | <input type="checkbox"/> |
| <b>3. Was the sample size adequate?</b>                                                                                                                                                                                                                                                                                                      |                          |                          |                          |                          |
| <ul style="list-style-type: none"> <li>• Yes: if sample size <math>\geq 139</math> (expected frequency 10%; precision 5%)</li> <li>• No: if sample size less than 139</li> </ul>                                                                                                                                                             | <input type="checkbox"/> | <input type="checkbox"/> | <input type="checkbox"/> | <input type="checkbox"/> |
| <b>4. Were the study subjects and the setting described in detail?</b>                                                                                                                                                                                                                                                                       |                          |                          |                          |                          |
| <ul style="list-style-type: none"> <li>• Patients<br/>Yes: if demographic data including number of participants, age, exposure days were clearly described</li> <li>• Assay<br/>Yes: if the method of antibody detection were described explicitly</li> <li>• Cut-off<br/>Yes: if the cut-off of antibody detection was mentioned</li> </ul> | <input type="checkbox"/> | <input type="checkbox"/> | <input type="checkbox"/> | <input type="checkbox"/> |

**5. Was the data analysis conducted with sufficient coverage of the identified sample?**

- PTP/PUP ☐ ☐ ☐ ☐
- Age
- severity

**6. Were valid methods used for the identification of the condition?**

- Yes: if NNA assay used positive controls as an internal standard and if FVIII specificity was measured by means of a competitive assay. ☐ ☐ ☐ ☐

**7. Was the condition measured in a standard, reliable way for all participants?**

- Yes: if the same test with the same cut-off point was used for all participants and Sample drawn in absence of clotting factor infusions ( wash out period taken) ☐ ☐ ☐ ☐
- Unclear: if not clearly stated whether all participants were assessed similarly

**8. Was there appropriate statistical analysis?**

- Yes: if numerator and denominator and Confidence interval for percentages were described ☐ ☐ ☐ ☐

**9. Was the response rate adequate, and if not, was the low response rate managed appropriately?**

- Unclear for all as we do not know the response rate in the studies ☐ ☐ ☐ ☐

Overall appraisal: Include ☐ Exclude ☐ Seek further info ☐

Comments (Including reason for exclusion)

---

---

## 2 Supplementary Figures and Tables

### 2.1 Supplementary Figures

#### 2.1.1 Supplementary Figure 1. Forest plot of NNA prevalence sorted by study sample size

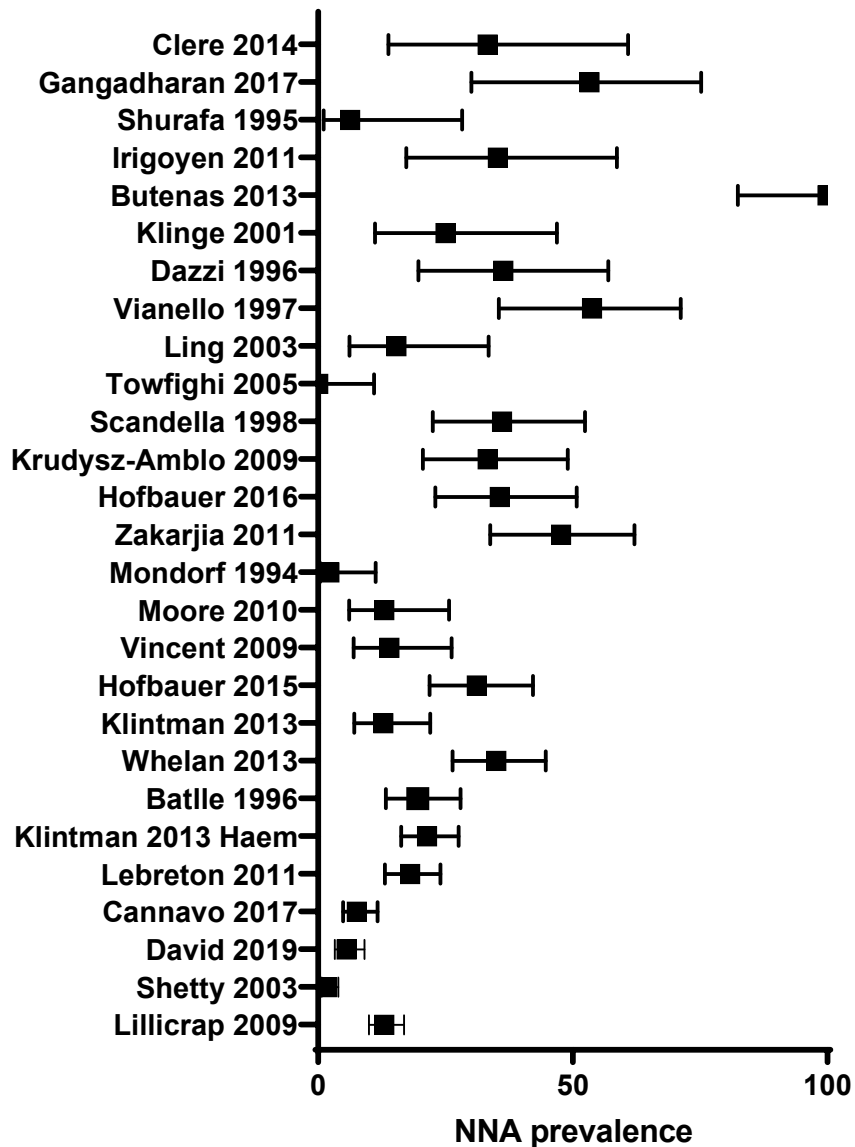

**Supplementary Figure 1.** Forest plot of NNA prevalences arranged by study sample size. Asymmetry in the forest plot could be identified, due to relatively high NNA prevalences in studies with small sample sizes.

## 2.2 Supplementary Tables

### 2.2.1 Supplementary Table 1. Excluded studies after further inspection

| Source   | Year | Country | Design | Included study population                                        | N total | N Inhibitor negative | NNA assay          | Inhibitor assay | Reason for exclusion                                                                                                                                                                                                                                                                                                                  |
|----------|------|---------|--------|------------------------------------------------------------------|---------|----------------------|--------------------|-----------------|---------------------------------------------------------------------------------------------------------------------------------------------------------------------------------------------------------------------------------------------------------------------------------------------------------------------------------------|
| Batty    | 2015 | UK      | CS     | HA, all severities, with and without inhibitor and AHA patients. | 225     | NR                   | ELISA <sup>a</sup> | NBA and mNBA    | Calculation of prevalence was not possible, due to multiple samples. Therefore, some patients may have had samples that were Bethesda and/or ELISA positive. This was verified with the author of original study.                                                                                                                     |
| Riddell* | 2013 | NR      | CS     | HA, all severities and AHA patients.                             | 109     | NR                   | ELISA <sup>b</sup> | NBA             | Calculation of prevalence was not possible, because the total number of inhibitor-negative patients also included patients with AHA (number not reported). Therefore the total number of inhibitor-negative patients with hemophilia A, was not known. The second reason for exclusion was inconsistency in reported patient numbers. |

Abbreviations: CS, cross-sectional; NR, not reported.

\*Conference abstract. <sup>a</sup> In Batty *et al.* NNAs were detected, when the optic density > kit controls (KC). The KC was derived from human serum containing antibodies to human FVIII. The KC is lot specific, defined by dilution studies of a known positive sample and is tested by the manufacturer to ensure that the threshold results in the expected reportable results in over 90 test samples (positive/negative Bethesda activity).<sup>b</sup> In Riddell *et al.* the cutoff for the ELISA was not reported.

#### References:

1. Batty P, Moore GW, Platton S, et al. Diagnostic accuracy study of a factor VIII ELISA for detection of factor VIII antibodies in congenital and acquired haemophilia A. *Thromb Haemost.* (2015). doi:10.1160/TH14-12-1062
2. Riddell A, Pickering WM, Lawler P, et al. Comparison of a ELISA FVIII inhibitor assay with the Nijmegen Modified Bethesda assay in patients with inherited and acquired haemophilia A. *J Thromb Haemost.* (2013) 2:935

**2.2.2 Supplementary Table 2. Prevalence of NNAs in healthy subjects**

| Source        | Healthy subjects |      |                              |
|---------------|------------------|------|------------------------------|
|               | N NNA-positive   | N HS | NNA prevalence<br>% (95% CI) |
| Hofbauer      | 17 <sup>a</sup>  | 634  | 2.7 (1.7 - 4.3)              |
| Whelan        | NR               | 600  | 19 (16 - 22)                 |
| Vincent       | 0                | 44   | 0 (0 - 8.0)                  |
| Shetty        | 0                | 31   | 0 (0 - 1.1)                  |
| Batlle        | 8                | 53   | 15.1 (7.9 - 27.1)            |
| Dazzi         | 4                | 20   | 20 (8.1 - 41.6)              |
| Mondorf       | 25               | 460  | 5.4 (3.7 - 7.9)              |
| Krudysz-Amblo | 4                | 150  | 2.7 (1.0 - 0.07)             |
| Shurafa       | 2                | 18   | 11 (3.1 - 32.8)              |

Abbreviations: HS, Healthy subjects.

<sup>a</sup> These NNA-positive HCs had a high-titer FVIII NNA.

**References:**

1. Hofbauer CJ, Whelan SFJ, Hirschler M, et al. Affinity of FVIII-specific antibodies reveals major differences between neutralizing and nonneutralizing antibodies in humans. 2015;125(7):1180-1189. doi:10.1182/blood-2014-09-598268.
2. Whelan SFJ, Hofbauer CJ, Horling FM, et al. healthy individuals and in different cohorts of hemophilia A patients Distinct characteristics of antibody responses against factor VIII in healthy individuals and in different cohorts of hemophilia A patients. 2013;121(6):1039-1048. doi:10.1182/blood-2012-07-444877
3. Vincent AM, Lillicrap D, Boulanger A, et al. Non-neutralizing anti-FVIII antibodies: Different binding specificity to different recombinant FVIII concentrates. *Haemophilia*. 2009. doi:10.1111/j.1365-2516.2008.01909.x
4. Shetty S, Ghosh K, Mohanty D. An ELISA assay for the detection of factor VIII antibodies - Comparison with the conventional Bethesda assay in a large cohort of haemophilia samples. *Acta Haematol*. 2003. doi:10.1159/000067272
5. Batlle J, Gómez E, Rendal E, et al. Antibodies to factor VIII in plasma of patients with hemophilia A and normal subjects. *Ann Hematol*. 1996. doi:10.1007/s002770050179
6. Dazzi F, Tison T, Vianello F, et al. High incidence of anti-FVIII antibodies against non-coagulant epitopes in haemophilia A patients: A possible role for the half-life of transfused FVIII. *Br J Haematol*. 1996. doi:10.1046/j.1365-2141.1996.d01-1705.x
7. Mondorf W, Klinge J, Luban NLC, Bray G, Saenko E, Scandella D. Low factor VIII recovery in haemophilia A patients without inhibitor titre is not due to the presence of anti-factor VIII antibodies undetectable by the Bethesda assay. *Haemophilia*. 2001. doi:10.1046/j.1365-2516.2001.00463.x
8. Krudysz-Amblo J, Parhami-Seren B, Butenas S, et al. Quantitation of anti-factor VIII antibodies in human plasma. *Blood*. 2009. doi:10.1182/blood-2008-08-174987
9. Shurafa M, Kithier K. IgG antibodies against factor VIII in normal individuals. *J Thromb Thrombolysis*. 1995. doi:10.1007/BF01064378
